# Supplementary material
Source: PubMed Central journal article supplement (PMC2375497)
Supplement: tjp0585-0549-SD1.pdf [file tjp0585-0549-SD1.pdf]

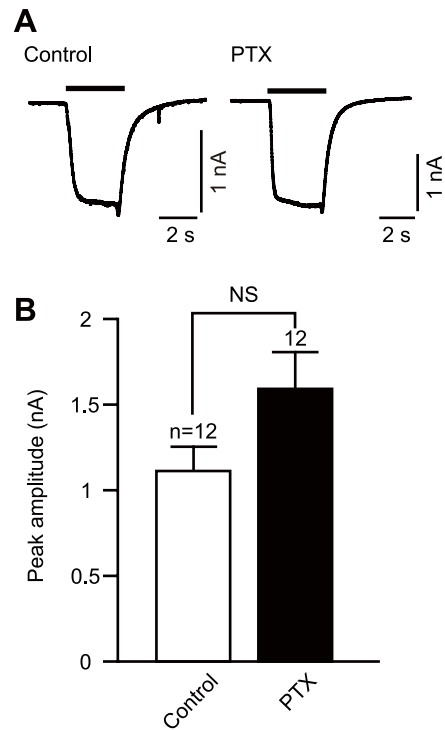

**Kamikubo et al. Supplemental Fig. 1**  
**Direct effect of PTX on glutamate-evoked currents.**

We measured inward currents evoked by locally applied L-glutamate (10  $\mu$ M, 3 s) in untreated (“Control”) and PTX-pretreated (500 ng ml<sup>-1</sup>, > 18 hr) Purkinje cells (Supplemental Fig. 1A). The membrane potential was held at -65 mV in a ruptured-patch whole-cell mode. The pipette solution contained (in mM): 130 CsCl, 10 NaCl, 10 Hepes, 0.5 EGTA, 4 Mg-ATP, 0.4 Na<sub>2</sub>-GTP (pH 7.35). The cells were perfused with a saline contained (in mM): 147 NaCl, 3 KCl, 10 Hepes, 10 D-glucose, 2 CaCl<sub>2</sub>, 1 MgCl<sub>2</sub>, 1  $\mu$ M tetrodotoxin, 10  $\mu$ M 3-((R)-2-Carboxypiperazin-4-yl)-propyl-1-phosphonic acid, and 10  $\mu$ M (-)-bicuculline methochloride (pH 7.3, ~25 °C). The amplitude of the glutamate-evoked currents was not smaller in the PTX-pretreated cells (1.59  $\pm$  0.22 nA, n = 12) than in the untreated cells (1.12  $\pm$  0.13 nA, n = 12)(p > 0.05, unpaired Student’s *t*-test; Supplemental Fig. 1B) Thus, PTX does not reduce glutamate-evoked currents as its direct effect.
